# Supplementary material
Source: Springer Nature journal article supplement (https://www.springerprofessional.de/resource/supplementary/13638_2013_846_MOESM4_ESM.pdf/11898596)

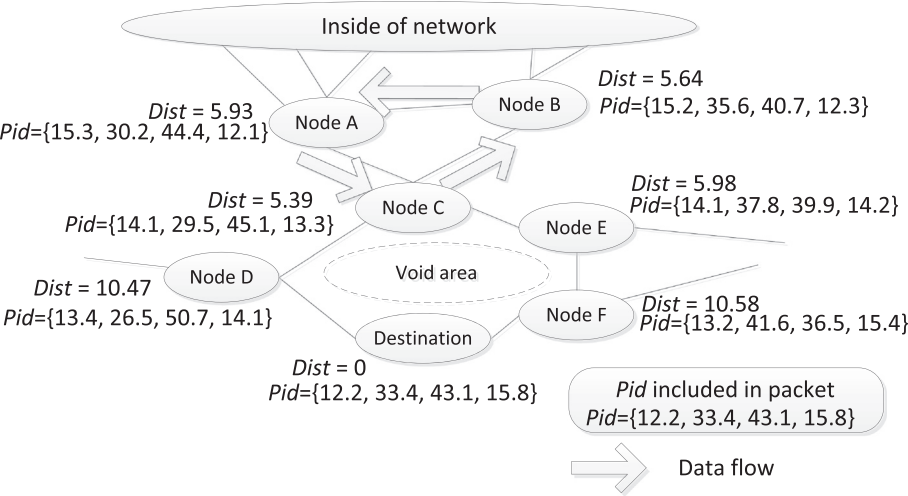

Supplement: MOESM4 [file 11898596]
